# Supplementary material for: Restorative Qualities of and Preference for Natural and Urban Soundscapes
Source: PubMed Central journal article supplement (PMC5632731; doi:10.3389/fpsyg.2017.01705), 2017-10-04
Supplement: Table_1.pdf [file Table_1.pdf]

**Supplementary Table 1.** Mean values and standard deviations of sounds from natural and urban environments

| <b>Natural environment</b> | <b><i>M</i></b> | <b><i>SD</i></b> | <b>Urban environment</b> | <b><i>M</i></b> | <b><i>SD</i></b> |
|----------------------------|-----------------|------------------|--------------------------|-----------------|------------------|
| Robin & river              | 3.48            | 0.82             | Concert                  | 3.59            | 0.62             |
| Wren & stream              | 3.43            | 0.93             | Fireworks                | 2.95            | 1.06             |
| Blackbird & clearing       | 3.14            | 1.00             | Barrel organ             | 2.80            | 0.95             |
| Sea                        | 3.09            | 0.88             | Carrousel                | 2.77            | 0.99             |
| Blackcap & wood            | 3.02            | 1.05             | Café                     | 2.77            | 1.16             |
| Larks & barrel warbler     | 2.89            | 1.13             | Parade (brass orchestra) | 2.75            | 1.06             |
| River                      | 2.72            | 1.10             | Swimming pool            | 2.48            | 1.15             |
| Nightingale                | 2.50            | 1.25             | Wind chimes              | 2.30            | 1.17             |
| Meadow (many birds)        | 2.39            | 1.21             | Church bells             | 2.16            | 1.18             |
| Great reed warbler         | 2.32            | 1.01             | Airplane landing         | 1.93            | 1.13             |
| Seagulls & wind            | 2.20            | 1.39             | Ice rink                 | 1.55            | 1.17             |
| Night (crickets & birds)   | 2.00            | 1.10             | Video arcade             | 1.27            | 1.26             |
| Ravens                     | 1.98            | 1.09             | Highway                  | 1.05            | 1.06             |
| Thunderstorm               | 1.80            | 1.44             | Lawn mower               | 0.82            | 1.06             |
| Frogs                      | 1.73            | 1.19             | Empty subway car         | 0.64            | 0.94             |
| Forest (boar & birds)      | 1.45            | 1.21             | Street noise             | 0.55            | 0.98             |
| Crows                      | 1.41            | 1.15             | Train                    | 0.50            | 0.76             |
| Corncrake                  | 1.32            | 1.18             | Street (ambulance)       | 0.41            | 1.09             |
| Eagle-owls                 | 1.18            | 1.23             | Construction site        | 0.27            | 0.62             |
| Deer in the rut            | 1.05            | 1.22             | Fire department (siren)  | 0.23            | 0.74             |
| Howling wolves             | 0.43            | 0.97             | Pneumatic hammer         | 0.20            | 0.55             |
| Swarm of insects           | 0.41            | 0.69             | Traffic jam & car horns  | 0.18            | 0.39             |
